# Supplementary material
Source: PubMed Central journal article supplement (PMC8144608)
Supplement: 41416_2021_1347_MOESM1_ESM.pdf [file 41416_2021_1347_MOESM1_ESM.pdf]

Online-Only Supplementary Material.

**Prevalent diabetes and risk of total, colorectal, prostate, and breast cancers in an ageing population: meta-analysis of individual participant data from cohorts of the CHANCES consortium**

Amina Amadou, Heinz Freisling<sup>#</sup>, et al.

Correspondence:

Heinz Freisling, PhD

International Agency for Research on Cancer (IARC/WHO),

Nutrition and Metabolism Branch

150 cours Albert Thomas

69372 Lyon CEDEX 08, France

Off. +33 472 738 664

Fax +33(0)472 738 361

E-mail: [freislingh@iarc.fr](mailto:freislingh@iarc.fr)

<https://orcid.org/0000-0001-8648-4998>

Supplementary Text 1: Power calculations

Supplementary Figure 1: Random effects meta-analysis of the association between diabetes and postmenopausal breast cancer risk.

Supplementary Figure 2: Random effects meta-analysis of the association between diabetes and total cancer risk by diabetes ascertainment (self-reported/mixed vs. documented).

Supplementary Table 1: Selected characteristics at recruitment by history of diabetes in all cohorts combined.

Supplementary Table 2: Sensitivity analyses using fixed effect meta-analysis and pooled analysis.

Supplementary Table 3: Association between diabetes status and cancer risk by age groups.

Supplementary Table 4: Association between diabetes status and cancer risk by World Health Organization (WHO) body mass index (BMI) categories.

Supplementary Table 5: Association between diabetes status and cancer risk by vigorous physical activity.

### **Supplementary Text 1:**

Power calculation for observed associations using the R package ‘powerSurvEpi’ available at <https://cran.r-project.org/web/packages/powerSurvEpi/powerSurvEpi.pdf>

A posteriori power calculations for observed hazard ratios indicated that our study was sufficiently powered ( $\geq 80\%$ ) for total cancer (men and women combined), colorectal cancer in men, and prostate cancer, but under-powered to detect the observed hazard ratios (or less extreme) for total cancer in men (77%), total cancer women (66%), colorectal cancer in women (69%), and breast cancer in women (25%). As for interaction analysis, shown in Supplementary Tables 2-5, only prostate cancer across categories of BMI was sufficiently powered (81%). All other interaction analyses had a power of 36% or less.

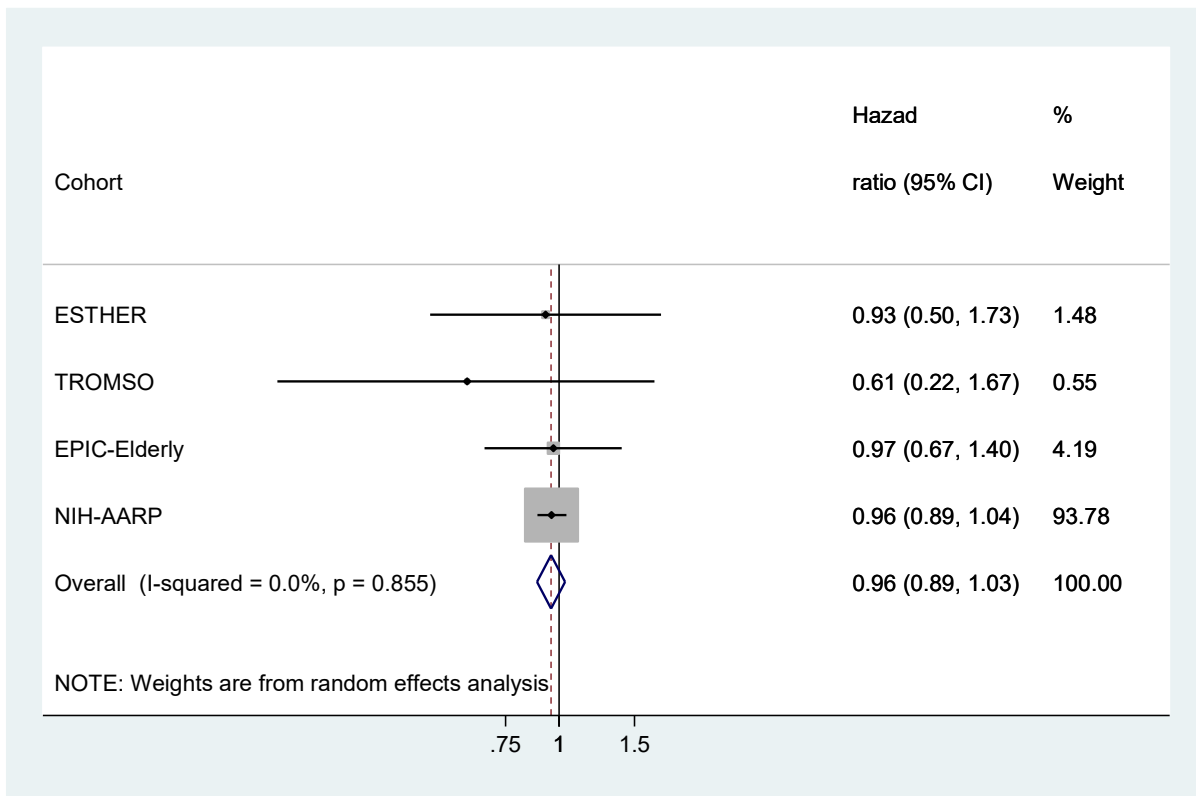

**Supplementary Figure 1:** Random effects meta-analysis of the association between diabetes and postmenopausal breast cancer risk.

Models were adjusted for country (EPIC-Elderly only), age (years), smoking status (never/ever), educational level (primary or less/primary or less than college or university/college or university), alcohol consumption (g/day), BMI, (kg/m<sup>2</sup>), vigorous physical activity (yes/no), and menopausal hormone therapy.

The size of each box indicates the relative weight of each study in the meta-analysis; the horizontal bars show the 95% confidence intervals (CI). Diamonds represent the combined HRs and 95% CI.

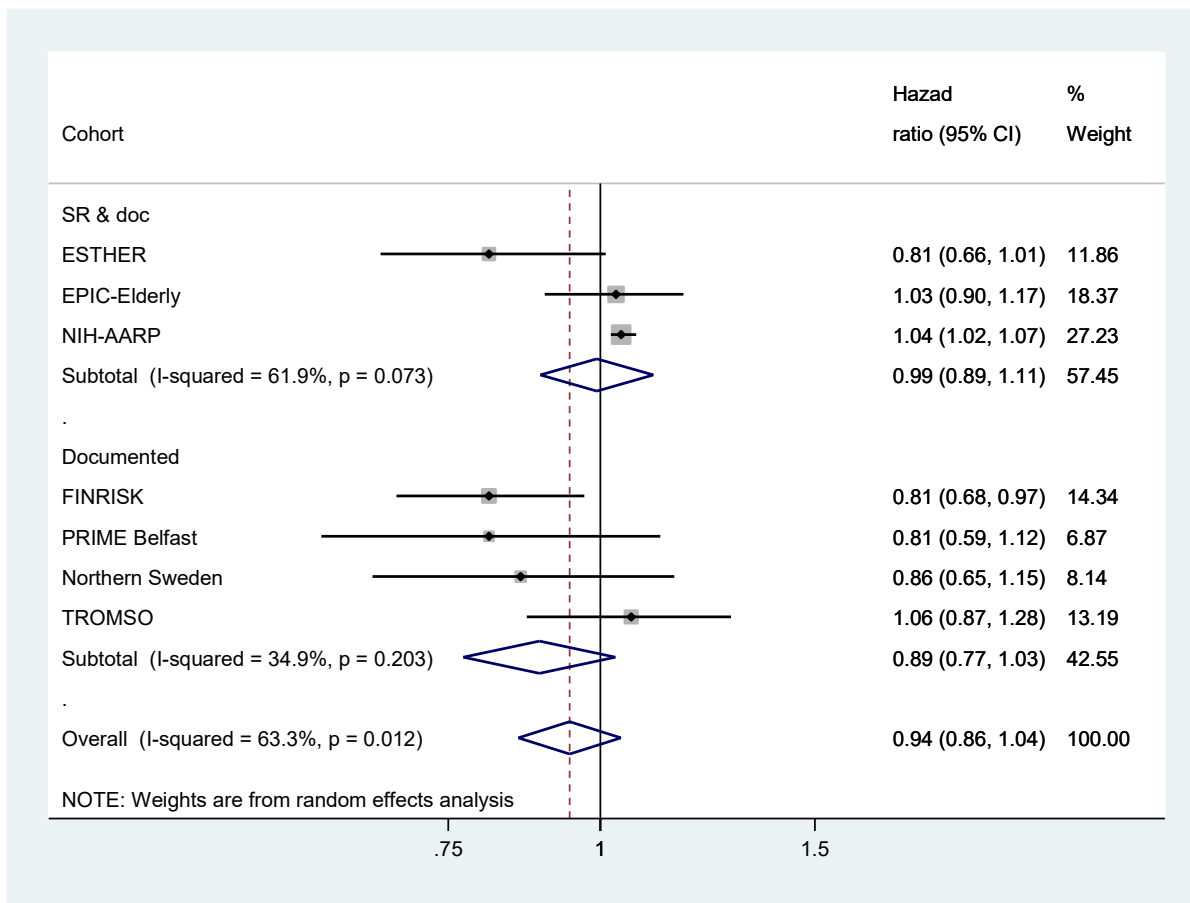

**Supplementary Figure 2:** Random effects meta-analysis of the association between diabetes and total cancer risk by diabetes ascertainment (self-reported/mixed vs. documented).

Models were adjusted for country (EPIC-Elderly only), age (years), smoking status (never/ever), educational level (primary or less/primary or less than college or university/college or university), alcohol consumption (g/day), BMI, (kg/m<sup>2</sup>), and vigorous physical activity (yes/no).

The size of each box indicates the relative weight of each study in the meta-analysis; the horizontal bars show the 95% confidence intervals (CI). Diamonds represent the combined HRs and 95% CI.

**Supplementary Table 1:** Selected characteristics at recruitment by history of diabetes in all cohorts combined

| Characteristic                      | History of diabetes    |                        |
|-------------------------------------|------------------------|------------------------|
|                                     | No (n=600,754 [90.7%]) | Yes (n=61,587 ([9.3%]) |
| Age (years), P50 (P25-P75)          | 62.1 (56.9-66.4)       | 63.4 (58.5-67.1)       |
| BMI* (kg/m <sup>2</sup> )           | 26.9 ± 4.9             | 29.7 ± 5.9             |
| Missing n, (%)                      | 62,612 (10.4)          | 6,353 (10.2)           |
| Alcohol intake* (g per day)         | 12.8 ± 36.3            | 8.2 ± 32.0             |
| Missing n, (%)                      | 4,376 (0.7)            | 481 (0.8)              |
| Smoking status                      |                        |                        |
| Never                               | 223,254 (37.1)         | 20,292 (32.9)          |
| Ever                                | 356,649 (59.4)         | 39,084 (63.5)          |
| Missing, n (%)                      | 20,851 (3.5)           | 2,211 (3.6)            |
| Vigorous physical activity          |                        |                        |
| No                                  | 296,553 (49.4)         | 34,900 (56.7)          |
| Yes                                 | 250,046 (41.6)         | 21,298 (34.6)          |
| Missing, n (%)                      | 54,155 (9.0)           | 5,389 (8.7)            |
| School level                        |                        |                        |
| Primary or less                     | 48,369 (8.1)           | 6,803 (11.1)           |
| > Primary - < college or university | 159,227 (26.5)         | 18,358 (29.8)          |
| College or university               | 377,286 (62.8)         | 34,397 (55.8)          |
| Missing                             | 15,872 (2.6)           | 2,029 (3.3)            |
| Total cancer                        |                        |                        |
| No                                  | 497,464 (82.8)         | 50,473 (82.0)          |
| Yes                                 | 103,290 (17.2)         | 11,114 (18.0)          |
| Colorectal cancer                   |                        |                        |
| No                                  | 544,899 (98.4)         | 55,739 (98.0)          |
| Yes                                 | 8,664 (1.6)            | 1,122 (2.0)            |
| Prostate cancer                     |                        |                        |
| No                                  | 519,428 (95.5)         | 54,209 (96.6)          |
| Yes                                 | 24,430 (4.5)           | 1,894 (3.4)            |
| Breast cancer                       |                        |                        |
| No                                  | 542,703 (98.0)         | 56,046 (98.6)          |
| Yes                                 | 10,860 (2.0)           | 815 (1.4)              |

Values are arithmetic means, SD (standard deviation), unless other specified.

\* Mean without imputation.

**Supplementary Table 2:** Sensitivity analyses using fixed effect meta-analysis and pooled analysis

|                          | Fixed effect meta-analysis |       |           | Pooled analysis  | Pooled analysis<br>** |
|--------------------------|----------------------------|-------|-----------|------------------|-----------------------|
|                          | HR (95% CI)                | $I^2$ | $P$ -het. | HR (95% CI)      | HR (95% CI)           |
| <b>Total cancer</b>      |                            |       |           |                  |                       |
| Overall                  | 1.03 (1.01-1.05)           | 63.3% | 0.012     | 1.04 (1.02-1.06) | 1.04 (1.02-1.07)      |
| Men                      | 1.01 (0.98-1.03)           | 39.5% | 0.128     | 1.01 (0.99-1.04) | 1.02 (0.99-1.04)      |
| Women                    | 1.11 (1.07-1.15)           | 59.3% | 0.031     | 1.11 (1.07-1.16) | 1.13 (1.09-1.18)      |
| <b>Colorectal cancer</b> |                            |       |           |                  |                       |
| Overall                  | 1.22 (1.14-1.30)           | 51.8% | 0.101     | 1.22 (1.15-1.30) | 1.22 (1.14-1.30)      |
| Men                      | 1.17 (1.08-1.26)           | 0.0%  | 0.395     | 1.18 (1.09-1.27) | 1.18 (1.09-1.27)      |
| Women                    | 1.33 (1.19-1.49)           | 46.0% | 0.135     | 1.34 (1.19-1.51) | 1.32 (1.17-1.48)      |
| Prostate cancer          | 0.81 (0.77-0.85)           | 0.0%  | 0.961     | 0.81 (0.77-0.85) | 0.81 (0.77-0.85)      |
| *Breast cancer           | 0.96 (0.89-1.03)           | 0.0%  | 0.855     | 0.96 (0.89-1.02) | 0.96 (0.89-1.03)      |

$P$ -het, heterogeneity associated with  $I$ -squared ( $I^2$ ).

Models were adjusted for country, age (years), smoking status (never/ever), educational level (primary or less/primary or less than college or university/college or university), alcohol consumption (g/day), BMI, (kg/m<sup>2</sup>), and vigorous physical activity (yes/no).

\*Further adjusted for hormone replacement therapy.

\*\* Multivariable adjusted models excluding participants with missing values; without any imputation of continuous data: percentage of missing data of alcohol and BMI equal to 0.7% and 10% of the total data, respectively.

**Supplementary Table 3:** Association between diabetes status and cancer risk by age groups

|                          | <b>Age (years)</b>            |                             |                             |                            | <i>P</i> interaction |
|--------------------------|-------------------------------|-----------------------------|-----------------------------|----------------------------|----------------------|
|                          | <b>&lt; 60</b><br>HR (98% CI) | <b>60-65</b><br>HR (98% CI) | <b>65-70</b><br>HR (98% CI) | <b>≥ 70</b><br>HR (98% CI) |                      |
| <b>Total cancer</b>      |                               |                             |                             |                            |                      |
| Overall                  | 1.06 (1.00-1.12)              | 1.01 (0.97-1.06)            | 1.05 (1.01-1.09)            | 1.02 (0.92-1.13)           | 0.261                |
| Men                      | 1.04 (0.97-1.11)              | 1.00 (0.95-1.06)            | 1.02 (0.97-1.06)            | 1.00 (0.89-1.12)           | 0.879                |
| Women                    | 1.10 (1.01-1.21)              | 1.05 (0.97-1.14)            | 1.17 (1.09-1.26)            | 1.08 (0.91-1.30)           | 0.085                |
| <b>Colorectal cancer</b> |                               |                             |                             |                            |                      |
| Overall                  | 1.26 (1.06-1.05)              | 1.13 (0.98-1.30)            | 1.28(1.14-1.43)             | 1.12 (0.83-1.51)           | 0.279                |
| Men                      | 1.26 (1.03-1.55)              | 1.16 (0.98-1.37)            | 1.16 (1.01-1.33)            | 1.13 (0.79-1.62)           | 0.797                |
| Women                    | 1.25 (0.89-1.75)              | 1.06 (0.81-1.39)            | 1.58(1.30-1.91)             | 1.08 (0.64-1.83)           | 0.045                |
| Prostate cancer          | 0.87 (0.76-0.98)              | 0.76 (0.69-0.85)            | 0.83 (0.76-0.90)            | 0.81 (0.63-1.02)           | 0.241                |
| *Breast cancer           | 0.95 (0.80-1.14)              | 0.95 (0.82-1.12)            | 0.99 (0.86-1.14)            | 0.93 (0.63-1.38)           | 0.827                |

HR, hazard ratios and 98% confidence intervals (CI) accounting for multiple testing using Bonferroni correction ( $100 - 5/k$  %);  $k=24$ ;  $P < 0.002$ .

Models were adjusted for country (EPIC-elderly only), age (years), smoking status (never/ever), educational level (primary or less/primary or less than college or university/college or university), alcohol consumption (g/day), BMI, ( $\text{kg}/\text{m}^2$ ), and vigorous physical activity (yes/no).

\*Further adjusted for hormone replacement therapy.

**Supplementary Table 4:** Association between diabetes status and cancer risk by World Health Organization (WHO) body mass index (BMI) categories.

|                          | <b>BMI &lt; 25 kg/m<sup>2</sup></b><br>HR (98% CI) | <b>BMI 25-&lt;30 kg/m<sup>2</sup></b><br>HR (98% CI) | <b>BMI ≥ 30 kg/m<sup>2</sup></b><br>HR (98% CI) | <i>P</i> interaction |
|--------------------------|----------------------------------------------------|------------------------------------------------------|-------------------------------------------------|----------------------|
| <b>Total cancer</b>      |                                                    |                                                      |                                                 |                      |
| Overall                  | 1.01 (0.95-1.07)                                   | 1.04 (1.00-1.07)                                     | 1.06 (1.01-1.10)                                | 0.044                |
| Men                      | 0.97 (0.91-1.04)                                   | 1.02 (0.98-1.06)                                     | 1.02 (0.97-1.07)                                | 0.421                |
| Women                    | 1.12 (1.00-1.24)                                   | 1.10 (1.02-1.18)                                     | 1.11 (1.04-1.19)                                | 0.176                |
| <b>Colorectal cancer</b> |                                                    |                                                      |                                                 |                      |
| Overall                  | 1.34 (1.12-1.59)                                   | 1.19 (1.06-1.33)                                     | 1.20 (1.06-1.36)                                | 0.847                |
| Men                      | 1.33 (1.08-1.63)                                   | 1.15 (1.01-1.31)                                     | 1.16 (1.00-1.35)                                | 0.225                |
| Women                    | 1.37 (1.00-1.89)                                   | 1.32 (1.05-1.66)                                     | 1.28 (1.05-1.57)                                | 0.650                |
| <b>Prostate cancer</b>   | <b>0.94 (0.83-1.07)</b>                            | <b>0.77 (0.71-0.83)</b>                              | <b>0.81 (0.73-0.89)</b>                         | <b>&lt; 0.001</b>    |
| *Breast cancer           | 1.01 (0.81-1.25)                                   | 0.90 (0.77-1.05)                                     | 0.97 (0.86-1.10)                                | 0.833                |

HR, hazard ratios and 98% confidence intervals (CI) accounting for multiple testing using Bonferroni correction ( $100 - 5/k$  %);  $k=24$ ;  $P < 0.002$ .

Models were adjusted for country, age (years), smoking status (never/ever), educational level (primary or less/primary or less than college or university/college or university), alcohol consumption (g/day), BMI, (kg/m<sup>2</sup>), and vigorous physical activity (yes/no).

\*Further adjusted for hormone replacement therapy.



**Supplementary Table 5:** Association between diabetes status and cancer risk by vigorous physical activity

|                   | <b>Vigorous physical activity = no</b><br>HR (98% CI) | <b>Vigorous physical activity = yes</b><br>HR (98% CI) | <i>P</i> interaction |
|-------------------|-------------------------------------------------------|--------------------------------------------------------|----------------------|
| Total cancer      |                                                       |                                                        |                      |
| Overall           | 1.06 (1.02-1.09)                                      | 1.02 (0.98-1.06)                                       | 0.019                |
| Men               | 1.02 (0.98-1.06)                                      | 1.00 (0.96-1.05)                                       | 0.253                |
| Women             | 1.14 (1.08-1.21)                                      | 1.08 (0.99-1.17)                                       | 0.032                |
| Colorectal cancer |                                                       |                                                        |                      |
| Overall           | 1.23 (1.12-1.35)                                      | 1.21 (1.07-1.37)                                       | 0.448                |
| Men               | 1.15 (1.02-1.30)                                      | 1.21 (1.05-1.39)                                       | 0.739                |
| Women             | 1.40 (1.19-1.65)                                      | 1.21 (0.94-1.57)                                       | 0.284                |
| Prostate cancer   | 0.82 (0.76-0.88)                                      | 0.80 (0.74-0.87)                                       | 0.780                |
| Breast cancer*    | 0.98 (0.88-1.09)                                      | 1.05 (0.90-1.22)                                       | 0.738                |

HR, hazard ratios and 98% confidence intervals (CI) accounting for multiple testing using Bonferroni correction ( $100 - 5/k \%$ );  $k=24$ ;  $P < 0.002$ .

Models were adjusted for country, age (years), smoking status (never/ever), educational level (primary or less/primary or less than college or university/college or university), alcohol consumption (g/day), BMI, (kg/m<sup>2</sup>), and vigorous physical activity (yes/no).

\*Further adjusted for hormone replacement therapy.
